# Supplementary material for: Structural design of pyrene-functionalized TEMPO-containing polymers for enhanced electrochemical storage performance
Source: Royal Society of Chemistry journal article supplement (doi:10.1039/d0py01421d), 2021-01-01
Supplement: d0py01421d1.pdf [file d0py01421d1.pdf]

## Structural design of pyrene-functionalized TEMPO containing polymers for enhanced electrochemical storage performance

Wenwen Xue <sup>a,b</sup>, Hatice Mutlu <sup>b</sup>, Hongjiao Li <sup>c</sup>, Wolfgang Wenzel <sup>c</sup> and Patrick Theato\* <sup>a, b</sup>

<sup>a</sup> Institute for Chemical Technology and Polymer Chemistry (ITCP), Karlsruhe Institute of Technology (KIT), Engesserstr. 18, D-76131, Karlsruhe, Germany, E-mail: patrick.theato@kit.edu

<sup>b</sup> Soft Matter Synthesis Laboratory - Institute for Biological Interfaces 3 (IBG 3), Karlsruhe Institute of Technology (KIT), Hermann-von-Helmholtz-Platz 1, D-76344, Eggenstein-Leopoldshafen, Germany

<sup>c</sup> Institute of Nanotechnology, Karlsruhe Institute of Technology (KIT), Hermann-von-Helmholtz-Platz 1, 76344 Eggenstein-Leopoldshafen, Germany

### Table of contents

|           |                                                                                                                                                                                                                     |
|-----------|---------------------------------------------------------------------------------------------------------------------------------------------------------------------------------------------------------------------|
| Table S1  | The interaction energy for graphene/pyrene derivatives and graphene/TEMPO.                                                                                                                                          |
| Figure S1 | Calibration curves of pyrene derivatives.                                                                                                                                                                           |
| Figure S2 | Fluorescence spectra of P2 and P2'.                                                                                                                                                                                 |
| Figure S3 | Molecular model of (A) graphene layer, (B) 1-amino-pyrene, (C) TEMPO and (D) 1-pyrenemethanol, as well as adsorption geometry of (E) TEMPO/graphene, (F) 1-amino-pyrene/graphene and (G) 1-pyrenemethanol/graphene. |
| Figure S4 | Charge-discharge profile of (A) P3 and (B) P4 at various C-rates.                                                                                                                                                   |

**Table S1.** The interaction energy for graphene/pyrene derivatives and graphene/TEMPO.

| Molecules        | $\Delta E$ (eV) |
|------------------|-----------------|
| 1-aminopyrene    | -0.022          |
| 1-pyrenemethanol | 0.006           |
| 4-amino-TEMPO    | 0.071           |

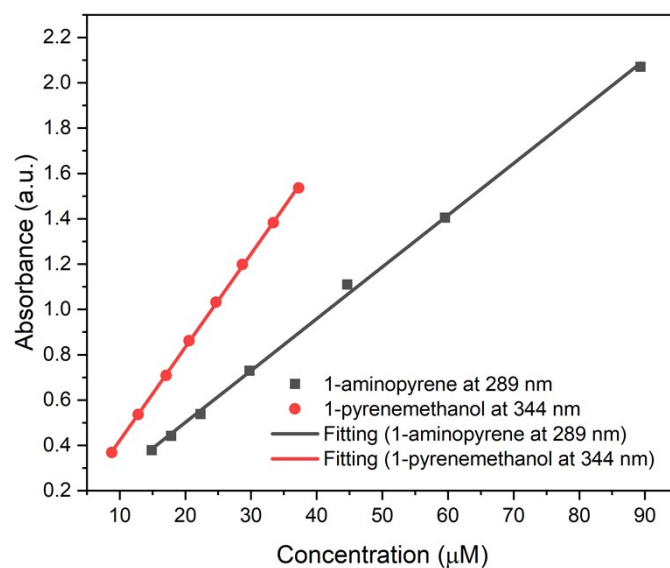

**Figure S1.** Calibration curves of pyrene derivatives.

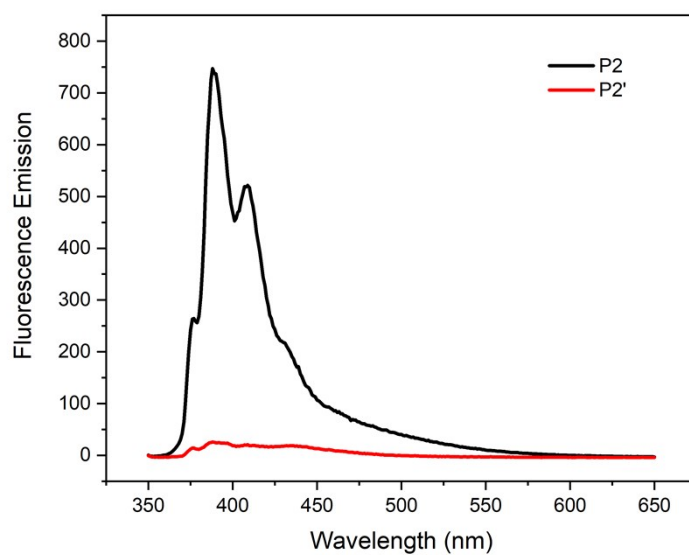

**Figure S2.** Fluorescence spectra of P2 and P2'.

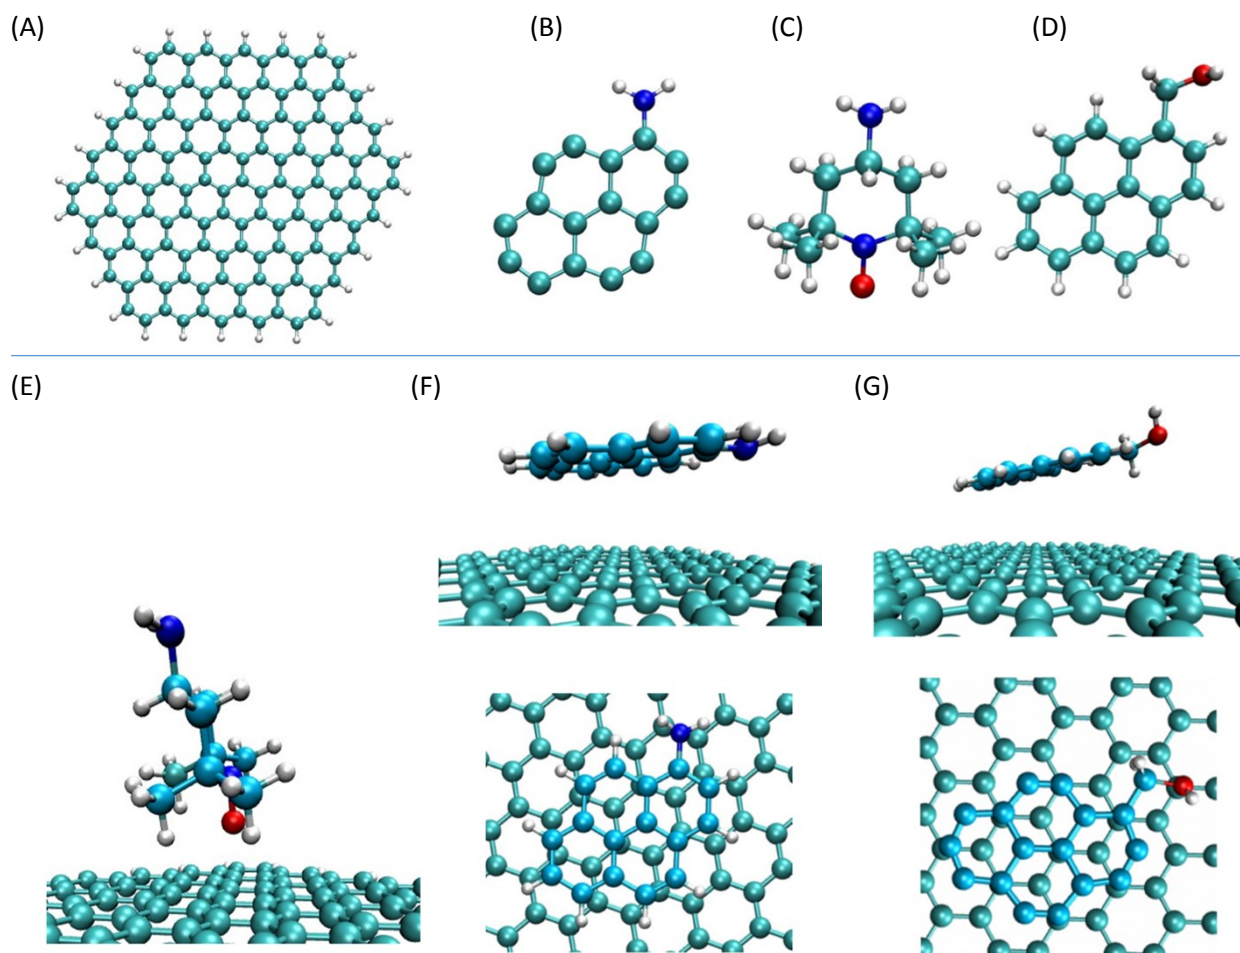

**Figure S3.** Molecular model of (A) graphene layer, (B) 1-amino-pyrene, (C) TEMPO and (D) 1-pyrenemethanol, as well as adsorption geometry of (E) TEMPO/graphene, (F) 1-amino-pyrene/graphene and (G) 1-pyrenemethanol/graphene.

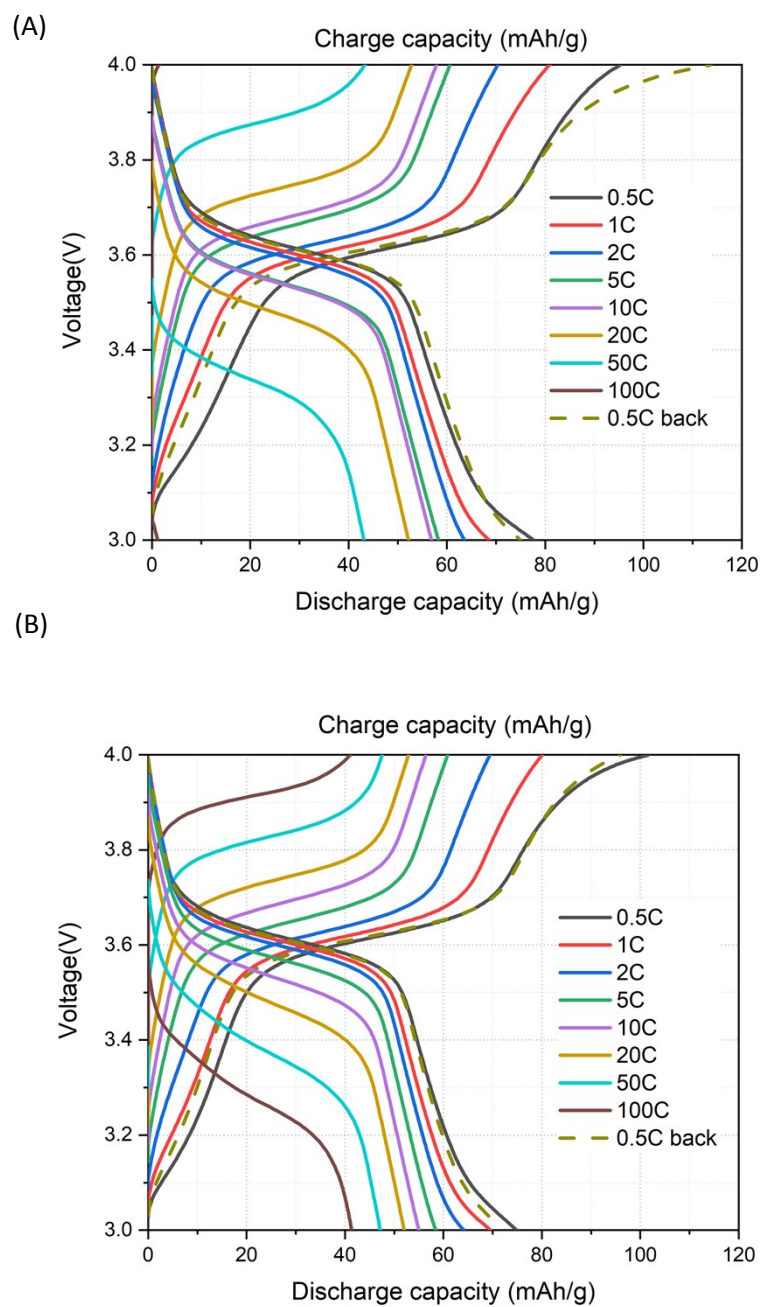

**Figure S4.** Charge-discharge profile of (A) P3 and (B) P4 at various C-rates.
